# 1 Comparative analysis of Synthetic Physical Interactions 2 with the yeast centrosome

3 Rowan S M Howell<sup>1,2</sup>, Attila Csikász-Nagy<sup>2,3</sup>, and Peter H Thorpe<sup>1,4</sup>

4 <sup>1</sup>The Francis Crick Institute, London, UK

5 <sup>2</sup>Randall Division of Cell and Molecular Biophysics, King's College, London

6 <sup>3</sup>Faculty of Information Technology and Bionics, Pázmány Péter Catholic  
7 University, Budapest, Hungary

8 <sup>4</sup>School of Biological and Chemical Sciences, Queen Mary University, London

9 January 7, 2019

## 10 **1 Abstract**

11 The yeast centrosome or Spindle Pole Body (SPB) is situated in the nuclear membrane,  
12 where it nucleates spindle microtubules and acts as a signalling hub. Previously, we used  
13 Synthetic Physical Interactions to map the regions of the cell that are sensitive to forced  
14 relocalization of proteins across the proteome [Berry et al., 2016]. Here, we expand on this  
15 work to show that the SPB, in particular, is sensitive to the relocalization of many proteins.  
16 This work inspired a new data analysis approach that indicates that relocalization screens  
17 may produce more growth defects than previously reported. A set of associations with  
18 the SPB result in elevated SPB number and since hyper-proliferation of centrosomes is a  
19 hallmark of cancer cells, these associations point the way for the use of yeast models in the  
20 study of spindle formation and chromosome segregation in cancer.

## 21 **2 Introduction**

22 Microtubule Organising Centres (MTOCs) are critical to the process of chromosome segre-  
23 gation in eukaryotes; abnormalities in the structure or number of centrosomes is strongly  
24 associated with human cancer [Nigg, 2006]. In *S. cerevisiae*, the MTOC is the Spindle

25 Pole Body (SPB). The SPB differs from metazoan centrosomes in its structure and in the  
26 fact that it remains embedded in the nuclear membrane throughout the closed mitosis of  
27 yeast [Fu et al., 2015]. However, despite these differences, there is significant conservation  
28 between yeast SPB proteins and human centrosomal proteins [Jaspersen and Winey, 2004],  
29 making the yeast SPB a relevant model of MTOCs.

30 Beyond their roles in microtubule nucleation, SPBs are thought to act as signalling  
31 hubs, with recruitment to the SPB a key step in regulation of certain signalling pathways  
32 [Fu et al., 2015, Arquint et al., 2014]. Various studies have used the strong interaction  
33 between GFP and GFP-Binding Protein (GBP) [Rothbauer et al., 2006], to test the effect  
34 of forced localization to the SPB, for example Gryaznova et al. [2016], Caydasi et al. [2017].  
35 However, no systematic study of forced relocalization to the SPB has been performed. We  
36 used the Synthetic Physical Interaction (SPI) methodology [Ólafsson and Thorpe, 2015] to  
37 test recruitment of more than 4,000 proteins to five locations around the SPB.

38 Proteome-wide SPI screens have been used in the past to probe the regulation of the  
39 kinetochore [Ólafsson and Thorpe, 2015, 2016] and a set of 23 SPI screens was used to  
40 generate a cell-wide map of proteins sensitive to relocalization [Berry et al., 2016]. Relative  
41 to the screens of Berry et al. our analysis shows that the SPB is particularly sensitive  
42 to forcible relocalization. As a result, we found that standard methods for analysis of  
43 genome-wide screens based on Z-transformations were unsuitable to analyse these screens.  
44 Efron [Efron, 2004] suggested an approach to multiple hypothesis testing, such as genome-  
45 wide screens, based around an empirically derived null distribution which he treated as a  
46 component of a finite mixture model to calculate significance of measured results. This  
47 empirical Bayes approach is widely used to analyse gene expression data, where it is used  
48 to classify the significance of correlations between genes, see for example [Schafer and  
49 Strimmer, 2005]. We adapted this approach to the analysis of the 23 SPI screens conducted  
50 by Berry et al. [2016] as well as the five SPB SPI screens. We used the “Mclust” package  
51 [Scrucca et al., 2016] to fit bimodal normal mixture models to our data, according to an  
52 approach outlined in [Fraley and Raftery, 2002]. This approach overcomes the limitations  
53 of Z-transformations as well as providing a parameterisation to compare screens and tools  
54 to predict the rate of validation. Berry et al. [2016] concluded that only a small fraction of  
55 proteins are sensitive to forced relocalisation. Our analysis suggests that specific regions of  
56 the cell, including the SPB, are far more sensitive to forcible relocalization.

57 Global analysis of the SPI data shows that the SPB is sensitive to forced interactions  
58 with a variety of classes of proteins, including proteins involved in microtubule nucleation,  
59 protein transport, lipid biosynthesis and the cell cycle. Proteins that caused growth defects

60 when recruited to the SPB originated from the nucleus and chromosomes as well as mem-  
61 branes and especially the endoplasmic reticulum. Although we found significant variation  
62 in individual results between regions of the SPB, the data from the SPB SPI screens was  
63 found to be more similar to each other than to the screens with other parts of the cell. Berry  
64 et al. [2016] concluded that only  $\sim 2\%$  of proteins were sensitive to forcible localization,  
65 our analysis suggests that locally this may vary with some regions, such as the SPB, far  
66 more sensitive than other parts.

67 A result of particular interest was that tethering nuclear pore proteins to the SPB  
68 caused growth defects. A growing body of work (reviewed in Jaspersen and Ghosh [2012],  
69 Rüttnick and Schiebel [2018]), shows that the process of SPB duplication and insertion  
70 into the nuclear membrane relies on machinery usually associated with the nuclear pore.  
71 We investigated whether these forced interactions between Spc42 and nuclear pore proteins  
72 resulted in abnormal SPB number. We found that several nuclear pore proteins, as well  
73 as the SPIN (SPB Insertion Network) and some currently-unclassified membrane proteins  
74 showed evidence of SPB overduplication. The current model for SPB duplication is that it  
75 is tied to the cell division cycle through sequential activation by Cdc14 and CDK [Rüttnick  
76 and Schiebel, 2018]. Our work suggests that forced localization of nuclear pore proteins to  
77 the SPB can decouple the process of SPB duplication from the cell cycle, a finding that may  
78 suggest refinement of the current model or that SPB duplication can occur via alternative  
79 pathways. The discovery of yeast strains that can overduplicate their SPBs may be of use  
80 as a model for cancer cells, which are known to exhibit significant variation in centrosome  
81 number [Nigg, 2006].

## 82 **3 Materials and Methods**

### 83 **3.1 Yeast strains and methods**

84 Yeast was cultured in standard growth media with 2% (w/v) glucose unless otherwise  
85 stated. GFP strains in this study are from a library derived from BY4741 (*his3 $\Delta$ 1 leu2 $\Delta$ 0*  
86 *met15 $\Delta$ 0 ura3 $\Delta$ 0*) [Huh et al., 2003, Tkach et al., 2012]. For each screen we constructed  
87 plasmids expressing an SPB-GBP-RFP construct and the SPB protein alone from the *CUP1*  
88 promoter; all plasmids are derived from pWJ1512 [Reid et al., 2011] and are listed in  
89 Table 2. Plasmids were constructed by gap repair either through in vivo recombination  
90 or the NEBuilder plasmid assembly tool (New England Biolabs, USA). Linear products  
91 were created through PCR with primers from Sigma Life Science and Q5 Polymerase (New  
92 England Biolabs, USA). The sequence of azurite fluorescent protein [Mena et al., 2006] was

93 synthesized by GeneArt (ThermoFisher Scientific, UK). The sequence of all plasmids was  
94 verified by Sanger sequencing (Genomics Equipment Park STP, Francis Crick Institute and  
95 Genewiz, UK).

## 96 **3.2 SPI screening**

97 The SPI screening process is described in detail in Berry et al. [2016] and in Ólafsson and  
98 Thorpe [2018]. A library of GFP strains is transformed with a plasmid expressing either a  
99 fusion of a protein of interest with GBP or a control, through a mating-based method known  
100 as Selective Ploidy Ablation (SPA) [Reid et al., 2011]. The plates are repeatedly copied and  
101 grown on successive rounds of selection media until a library of haploid GFP strains with  
102 the plasmid is produced. This library is assayed for colony size, giving a readout for the  
103 fitness of a given binary fusion between the GFP strain and protein of interest. Plates were  
104 scanned on a desktop flatbed scanner (Epson V750 Pro, Seiko Epson Corporation, Japan)  
105 at a resolution of 300 dpi. All plates were grown at 30°C. All copying of yeast colonies was  
106 performed on a Rotor robot (Singer Instruments, UK).

## 107 **3.3 Quantitative analysis of high-throughput yeast growth**

108 Scanned images were analysed computationally to extract measurements of the colony sizes.  
109 The online tool ScreenMill [Dittmar et al., 2010] was used to perform normalisation and  
110 calculate Log Growth Ratios (LGRs) and Z-scores by comparison of experimental and  
111 control colony sizes. Two controls were used (plasmids expressing GBP or the SPB protein  
112 alone) but, as in previous studies, we found strong agreement between the two and we used  
113 an average of the two values. In some cases, the library contained multiple copies of the  
114 same GFP strain, in these cases data was aggregated by averaging. In the proteome-wide  
115 screens plates were normalised to the plate median while in the validation screens GFP-  
116 free controls were used for normalisation. LGRs were further normalised using a spatial  
117 smoothing algorithm as described in Berry et al. [2016]. Bimodal normal mixture models  
118 were fitted to the smoothed LGR data using the “Mclust” package [Scrucca et al., 2016].  
119 Further details can be found in the supplementary materials. R scripts for data formatting  
120 and analysis are freely available at <https://github.com/RowanHowell/data-analysis>.

## 121 **3.4 Bioinformatics**

122 The GOrilla website ([cbl-gorilla.cs.technion.ac.il](http://cbl-gorilla.cs.technion.ac.il) [Eden et al., 2009]) was used to perform all  
123 gene ontology enrichment analysis. The “cluster” program (version 3.0) [Eisen et al., 1998]  
124 was used to perform hierarchical clustering of the SPI data; Java Treeview [Saldanha, 2004]

125 was used to visualize the results. Clustering was performed using either the correlation of  
126 the LGRs, minimizing the average linkage of the clusters.

### 127 **3.5 Fluorescence microscopy**

128 To examine localization of the SPB-GBP-RFP construct, and GFP-tagged proteins, cells  
129 were grown shaking overnight at 23°C in -leucine media, supplemented with additional  
130 adenine. They were then imaged with a Zeiss Axioimager Z2 microscope (Carl Zeiss AG,  
131 Germany), with a 63x 1.4NA oil immersion lens and using a Zeiss Colibri LED illumination  
132 system (GFP=470 nm, RFP=590 nm, azurite=385nm). Bright field images were obtained  
133 and visualised using differential interference contrast (DIC) prisms. Images were captured  
134 using a Hamamatsu Flash 4 Lte. CMOS camera containing a FL-400 sensor with 6.5  
135 mm pixels, binned 2x2. Images were prepared with Velocity software (Perkin Elmer Inc.,  
136 USA). To screen for abnormal numbers of foci in strains containing Spc42-GBP-RFP and  
137 GFP-tagged proteins, a plate of strains was prepared using the SPA methodology described  
138 above. In this assay, the Spc42-GBP-RFP plasmid (pHT11) was accompanied by a plasmid  
139 expressing Htb2-Azurite (pHT 706) with nourseothricin (*NAT*) selection. The Htb2-Azurite  
140 construct allowed for identification of the nucleus. On the same day, cells were picked from  
141 the plate and suspended in water and them imaged as described above. Dead cells were  
142 identified by a high level of dispersed fluorescence, and were excluded, as were cells with  
143 no visible fluorescence in the RFP channel.

## 144 **4 Results**

### 145 **4.1 Synthetic Physical Interaction screens with the SPB**

146 The budding yeast SPB is embedded in the nuclear membrane with one face, known as the  
147 inner plaque, directed into the nucleus and the other, known as the outer plaque, facing into  
148 the cytoplasm [Jaspersen and Winey, 2004] (Figure 1A). A central plaque links the inner  
149 and outer faces of the SPB and connects to a structure known as the half-bridge, which  
150 is involved in SPB duplication. In order to understand the effect of localising proteins to  
151 different parts of the SPB, we performed genome-wide Synthetic Physical Interaction screens  
152 with multiple target proteins: Nud1, Spc42, Spc72 and Spc110 N-termini and Spc110 C-  
153 terminus GBP fusions. Nud1 and Spc72 are situated in the outer plaque of the SPB; the  
154 N-terminus of Spc110 lies on the inner plaque while its C-terminus is located, with Spc42,  
155 in the central plaque [Jaspersen and Winey, 2004].

156 SPI screens aim to test the effects of forced relocalization of gene products across the

157 genome [Ólafsson and Thorpe, 2015]. In each screen, a target gene tagged with GBP (GFP-  
158 Binding Protein) is introduced into a library of GFP strains [Tkach et al., 2012] to induce  
159 binary fusions between the target protein and the GFP-tagged query protein. Growth  
160 of colonies under these conditions is measured and an average LGR (Log Growth Ratio)  
161 between the experimental strain and two control strains is calculated, providing a measure  
162 of any growth defect caused by the artificial protein-protein interaction. Additionally, a  
163 Z-transformation is applied to assess the significance of the results. A Z-transformation  
164 assumes the data is normally distributed and uses the mean and variance of the data  
165 to transform each data point to a Z-score, which are distributed according to a normal  
166 distribution with a mean of 0 and a standard deviation of 1. This simplifies analysis,  
167 in Z-space the region  $(-2, 2)$  represents the 95% confidence interval. Similarly to genetic  
168 interactions, we say a forced association between proteins is a SPI only if this combination  
169 causes a growth defect.

170 We predicted that, due to the structural integrity of the SPB, the GFP-tagged query  
171 proteins were more likely to be recruited to the GBP-tagged target protein than vice versa.  
172 Fluorescence microscopy of 48 representative strains demonstrated that 60%–80% of strains  
173 viewed showed localization patterns consistent with recruitment of the query protein to the  
174 SPB (Figure 1B) in the Nud1, Spc42, Spc110C and Spc110N screens; a finding in keeping  
175 with the results of Berry et al. [2016]. Genome-wide screens often have high rates of type  
176 I errors (false positives) so we validated a selection of strains with high or, in some cases,  
177 low, negative LGRs. Validation screens were performed with 16, rather than 4, replicates of  
178 each strain and “validation” of a result was defined by a LGR exceeding a threshold set by  
179 GFP-free controls. Each of the screens identified  $\sim 150$  strains with Z-scores greater than  
180 2 and we validated 240 strains for each screen. The remaining strains were chosen as those  
181 just below the Z-score of 2 cutoff and “growth enhancers” - strains with Z-score less than  
182  $-2$ , these were found mainly in the Spc110C and Spc110N screens. The growth enhancers  
183 were found not to validate frequently in either screen, these strains are likely slow growing  
184 generally, which can lead to inaccurate LGRs (see Figure 2A). We were surprised to discover  
185 that almost all of the strains with Z-scores above 2 validated and many that lay below this  
186 cutoff validated as well (Figure 1C). Furthermore, when we plotted the distribution of LGRs  
187 against LGRs from a dataset of 23 SPI screens [Berry et al., 2016], we noticed that the  
188 SPB screens generally had more, high LGR strains than other screens (Figure 1D). We  
189 hypothesized that the SPB was particularly sensitive to forced localization and that these  
190 screens identified many true hits. However this was not reflected in the number of hits  
191 according to the Z-score. As the Z-transformation is based on the assumption that data

192 is normally distributed, it will become inappropriate when the data deviates significantly  
193 from this distribution, as we would expect in the case of a screen with many hits. Therefore,  
194 we developed a novel statistical methodology to analyze significance in SPI screens.

## 195 **4.2 Mixture models are an effective model for SPI screen data**

196 Based on the approach of Efron [2004], we developed an empirical Bayes methodology to  
197 analyze SPI screen data based on mixture models. Genome-wide screens, such as SPI  
198 screens, typically apply an experimental procedure to assign every gene in the genome  
199 a value. In yeast screens, such as SPI or yeast-two-hybrid screens, this measure often  
200 characterizes the growth of a colony. Analysis of these screens generally assumes that the  
201 distribution of colony sizes under equal conditions will follow a lognormal distribution,  
202 so that the logarithm of these sizes is normally distributed. However, when performing  
203 a genome-wide screen, we expect some small but non-zero proportion of strains to have  
204 reduced fitness and grow more slowly. We hypothesized that in certain cases, where a  
205 significant number of genes are affected, screening data will not fit a normal distribution. In  
206 a previous study, Berry et al. [2016] performed 23 SPI screens using GBP fusions in different  
207 compartments of the cell, in order to build up a map of protein localization sensitivity. We  
208 combined this dataset of screens with the SPB SPI data to assess the performance of Z-  
209 transformations in different proteome-wide screens.

210 We found that the LGRs are not distributed according to a normal distribution (Figure  
211 2B). We reasoned that we could take advantage of the assumption that the data contained  
212 two distinct categories, unaffected and affected by forced localization, to develop an im-  
213 proved statistical model of the data. We used the “Mclust” package [Scrucca et al., 2016]  
214 to fit bimodal normal mixture models [Fraley and Raftery, 2002] to the SPI data (Figure  
215 2). These mixture models matched the distribution of SPI data more successfully than uni-  
216 modal normal distributions (Figure 2B). We found that for 20 of the 28 screens the fitted  
217 mixture model matched our intuition of a “central” peak representing unaffected genes and  
218 a “hit” peak, shifted to the right representing genes affected by the forced interaction. The  
219 data for the remaining eight screens did not show well-defined hit peaks. An underlying  
220 assumption of our analysis is that the non-hits will be distributed according to a normal  
221 distribution, so in screens with few hits, we would expect a normal model to fit the data  
222 effectively. We interpret the failure of the mixture model to identify a well-defined hit peak  
223 in these eight screens as indicating that the screens have few hits and that therefore, in these  
224 cases, a Z-transformation would be appropriate. When present, the two overlapping, peaks  
225 in the data allows for the identification of two defined categories in the data. Component

226 1, or the central peak, contains genes unaffected by the interaction and is distributed nor-  
227 mally due to noise in measurement. Component 2, or the hit peak, contains genes affected  
228 by the interaction, the shape of this distribution represents both effects of noise and the  
229 distribution of strength of real growth defects. We do not know *a priori* the shape of the  
230 distribution of interactions effects, but here we make the assumption it is gaussian.

### 231 4.3 Tools based on mixture models

232 Having determined that mixture models are a more appropriate statistical model than a  
233 normal distribution, we developed metrics to determine the significance of individual results  
234 and cutoffs to distinguish hits from non-hits. A typical approach in genome-wide screens  
235 is to calculate p-values based on a null model of the data. In the case of mixture models,  
236 identifying Component 1 as an empirical null model for the data allows for calculation of  
237 p-values, which may be adjusted for multiple hypothesis testing, for example by calculating  
238 FDR q-values [Benjamini and Hochberg, 1995]. However, in this context a more natural  
239 approach is to calculate the conditional probability of inclusion in Component 2. We define  
240  $q(x)$  to be the probability of inclusion in Component 2 given a measured LGR of  $x$ . The  
241 point where  $q(x) = 0.5$  is the point where a strain with measured LGR  $x$  is equally likely  
242 to be in Component 1 or 2, and is therefore a logical point to place a cutoff. We define  
243 this point as  $L_{q,0.5}$ , while the point where a Z-transformation of the data has value 2 is  
244  $L_Z$ . We found that  $L_{q,0.5}$  always sat below the  $L_Z$  but this effect was more pronounced in  
245 screens with more hits. Notably using Z-score as a cutoff limited the range of numbers of  
246 hits to 100-250. In contrast, using  $L_{q,0.5}$  as a cutoff has a dynamic range of 100-700 hits  
247 (Figure 3A). This makes the mixture model approach a more effective tool than Z-score to  
248 distinguish between screens with many or few hits.

249 The top hits from genome-wide screens are commonly validated by repeating the screen  
250 either to verify key results or to establish metrics such as the False Positive Rate (FPR).  
251 Validation is undesirable as it requires further resources and, in some cases, may not be  
252 practical, so we developed a statistical method to predict the FPR. In the validation screens,  
253 16 replicates were used as opposed to 4 in the original genome-wide screens. Furthermore,  
254 a hit was considered to be validated if the measured LGR was considered to be significant  
255 relative to GFP-free controls. Validation is considered to be a “gold-standard” for hit  
256 verification as it corresponds closely to other assays for growth defects such as spot tests.  
257 As the  $q(x)$  cutoffs were lower than the Z-score cutoffs we were concerned that they may  
258 not be reliable indicators of validation. Indeed, most of the  $q(x)$  cutoffs lay below the 40%  
259 FPR point at which Berry et al. [2016] stopped validating. It is worth noting that results



260 that do not validate may still be reproducible and biologically interesting despite having  
261 relatively subtle effects on growth that are difficult to distinguish from the variability in  
262 wild type growth. Therefore, we developed a method to predict the likelihood of validation.  
263 Using the fitted mixture models, we developed a metric  $pV(x)$ , representing the probability  
264 of validation for a strain with measured LGR  $x$ .  $pV(x)$  is generally successful at predicting  
265 the rate of validation in a screen (Figure 3B). For the 20 SPI screens which were fit well  
266 by the mixture models, the validation rate of 18 of these screens was predicted well by  
267  $pV(x)$ . The other two generally had very poor validation rates in general, making any kind  
268 of validation prediction unlikely to succeed. Plotting the variance and means of Component  
269 2 for each of the SPI screens (Figure 3D) shows that both of these screens are outliers with  
270 very high variances. Therefore, we recommend that when using this approach, great care  
271 is taken when the variance of Component 2 is high. Comparison of specific points, for  
272 example 20% FPR, shows good predictive power (Figure 3C).

#### 273 **4.4 The SPB is especially sensitive to forced relocation**

274 When we compared the SPI screens using SPB components with the previous screens using  
275 other structures throughout the cell, we noticed some key differences. Figure 3A shows  
276 that the SPB SPI screens are among the screens with the greatest number of hits, both by  
277 Z-score and  $q(x)$  cutoff. The fitted mixture models offer an additional way to understand  
278 this difference. Within a SPI screen, we may wish to distinguish between the case of a large  
279 proportion of strains being affected in a minor way and a smaller proportion of strains  
280 being very strongly affected. The fitted parameters  $\rho_2$  and  $\mu_2$  reflect the proportion of  
281 strains affected and the severity of these effects respectively. Plotting these two parameters  
282 together therefore provides a graphical way to compare screens. This is shown in Figure 3E,  
283 where we see that the SPI screens sit in the topright region of the graph as they have high  
284 values of  $\rho_2$  and  $\mu_2$ . In particular, Spc42 and Nud1 produce especially strong SPIs (high  
285  $\mu_2$ ), while the Spc110 screens produce weaker SPIs but with many different strains (high  
286  $\rho_2$ ). Spc72 is more midrange, possibly reflecting the fact that in the S288C background,  
287 *SPC72* is a non-essential gene [Giaever et al., 2002]. Notably, Loa1 has a high value of  $\sigma_2$ ,  
288 Heh2 has a high value of  $\mu_2$  and Sec7 and Sec63 sit near to Spc42 and Nud1. All four of  
289 these proteins localize to the ER, golgi or nuclear membrane, suggesting that these regions  
290 specifically may be the most sensitive to forcible relocation.

291 We used hierarchical clustering to compare the SPB screens to the other SPI screens  
292 in the dataset (Figure 4). The data was clustered both vertically (by GFP strain) and  
293 horizontally (by screen). Clustering by screen shows the five SPB screens are more similar

294 to each other than to other screens in the dataset, suggesting there is a characteristic set of  
295 proteins that are sensitive to forced localization to the SPB. Clustering the data by GFP  
296 strain identifies clusters of biologically related proteins with similar profiles of localization  
297 sensitivity, as previously reported [Berry et al., 2016]. Clusters of proteins with SPIs with  
298 the SPB group together, for example, the fatty acid elongases Elo1, Elo2 and Elo3; and the  
299 two paralogs of HMG-CoA reductase Hmg1 and Hmg2. These clusters also link together  
300 members of protein complexes such as the ER membrane protein complex (EMC) and  
301 oligosaccharyltransferase complex (OST). The clustering identifies a group of proteins that  
302 appear to enhance growth when forced to interact with both termini of Spc110. This group  
303 is not significantly enriched for any GO terms, however, it does include Mad2, consistent  
304 with the idea that partial Mad2 perturbation may accelerate cell cycle progression [Barnhart  
305 et al., 2011]. However, we found that growth enhancers were unlikely to reproduce their  
306 behaviour in validation screens. The vertical clustering also identifies a collection of proteins  
307 that are sensitive to forcible relocation to all or most parts of the cell. This group  
308 of proteins, known as "frequent flyers", are enriched for transcription factors and nuclear  
309 proteins.

310 In order to understand which kinds of proteins are sensitive to forced relocation to  
311 each part of the SPB, we performed Gene Ontology (GO) analysis of the ranked LGRs  
312 for each of the screens using the GOrilla tool [Eden et al., 2009]. Heatmaps of significant  
313 enrichments are shown in Figure 5. The screens with Spc42, Spc110C and Spc110N fusions  
314 were all significantly enriched for proteins involved in lipid metabolic process and proteins  
315 from the ER. In particular, there was significant enrichment for proteins involved in biosyn-  
316 thesis of sterols, sphingolipids and those involved in fatty acid elongation (Supp. Figure 5).  
317 The position of the SPB, embedded within the nuclear membrane [Jaspersen and Winey,  
318 2004], suggests that these growth defects may result from dysregulation of nuclear membrane  
319 composition. Furthermore Witkin et al. [2010] found that deletion of *SPO7*, a regulator of  
320 phospholipid biosynthesis, could partially suppress the monopolar phenotype of mutations  
321 in *MPS3*, suggesting that the membrane environment can impact on SPB duplication. We  
322 also found that the screens with Nud1, Spc72 and Spc110N, the proteins located closest to  
323 the sites of microtubule nucleation, were enriched for proteins involved in the process of mi-  
324 crotubule nucleation. These findings suggest that targeting these proteins artificially to the  
325 SPB can induce growth defects, possibly due to problems with spindle formation or nuclear  
326 positioning. An intriguing result is the finding that all screens, except Spc42, were enriched  
327 for proteins involved in chromosome segregation and components of the chromosome and  
328 kinetochore; there is evidence for example from yeast-two-hybrid screens that kinetochore

329 proteins physically interact with SPB components [Wong et al., 2007]. It is worth noting  
330 that these phenotypes may simply represent disruption of these structures by removal of  
331 the protein to the SPB, although these proteins were not frequent flyers. Nud1 and Spc72  
332 are thought to act as a signalling scaffold for proteins in the Mitotic Exit Network pathway  
333 [Scarfone and Piatti, 2015] and screens with these proteins were enriched for mitotic cell  
334 cycle proteins. Finally, we found that the Spc42 screen was enriched for proteins involved  
335 in nuclear pore organization as well as subunits of the nuclear pore. Intriguingly, some of  
336 these findings overlap with known genetic interactions, for example deletion of *NUP157* sup-  
337 presses the *spc42-11* mutation [Witkin et al., 2010], while we found that tethering Nup157  
338 to Spc42 lead to a growth defect. Due to the proposed link between SPB duplication and  
339 insertion and the nuclear pore [Rüthnick and Schiebel, 2018] we investigated these results  
340 further.

#### 341 4.5 SPIs with the SPB lead to SPB overduplication

342 We investigated whether we could detect any SPB duplication phenotype caused by forcible  
343 localization of proteins to the SPB. We screened 80 query proteins that we suspected would  
344 cause defects in SPB duplication against the Spc42-GBP-RFP fusion. These proteins in-  
345 cluded proteins known to play a role in SPB duplication, such as the SPIN network and  
346 nuclear pore complex proteins as well as other transport proteins and hits from the screen  
347 that are as yet un-annotated. Cells were imaged using fluorescence microscopy and the  
348 number of SPBs, as approximated by the number of RFP foci, were counted. In particular,  
349 we searched for cells with 3 or more foci. In strains expressing membrane or pore proteins  
350 tagged with GFP we observed recruitment of Spc42-GBP-RFP to these regions, however  
351 small regions with relatively high RFP signal were observed and interpreted to represent  
352 SPBs. We found evidence of extra SPBs in eleven different strains (Table 1). In some cases,  
353 a single red focus was observed in large budded cells, however the slow-folding nature of  
354 RFP prevented us from ruling out the possibility of further SPBs that are unmarked by ma-  
355 ture RFP. Screening cells directly from the SPI screen meant that limited number of cells  
356 were available to image in slow-growing SPI strains. Therefore, we directly transformed  
357 these strains, alongside the four members of the SPIN network, with the Spc42-GBP-RFP  
358 plasmid. We were able to establish colonies of all strains except Crm1-GFP. Using these  
359 strains we imaged larger quantities of these cells (Figure 6A). We detected extra red foci in  
360 each of these strains and quantified the proportion of cells expressing this phenotype (Figure  
361 6B). Notably, we found that the strength of growth defect as measured by the LGR was not  
362 a strong indicator of the frequency of extra red foci, suggesting the growth defect does not

363 arise entirely from this phenotype. Note that the protein denoted by its ORF, YJL021C, is  
364 included in these results however this ORF was determined to overlap *YJL020C* Brachat  
365 et al. [2003] meaning the GFP product in this strain is likely not a simple N-terminal fusion.  
366 Furthermore, the GFP strain shows a punctate fluorescent signal, meaning the extra red  
367 foci in these cells may represent relocalization of Spc42-GBP-RFP to YJL021C-GFP foci.  
368 These results suggest that the forced interaction of these proteins with the SPB results in  
369 aggregates of the Spc42 protein that may indicate extra SPBs.

| Protein  | Database Location | Screen LGR | Retest LGR |
|----------|-------------------|------------|------------|
| Apq12    | ER                | 1.58       | 1.46       |
| Crm1     | Nucleus           | 1.23       | 0.54       |
| Nic96    | Nuclear Periphery | 1.06       | 1.20       |
| Nsp1     | Nuclear Periphery | 0.91       | 0.36       |
| Nup133   | Nuclear Periphery | 0.23       | 0.27       |
| Nup170   | Nuclear Periphery | 0.19       | 0.33       |
| Pom34    | Nuclear Periphery | 0.46       | 0.77       |
| YDL121C  | ER                | 2.40       | 1.83       |
| YJL021C* | Punctate          | 0.74       | 0.95       |
| YPR071W  | ER                | 0.42       | 0.82       |
| YPR114W  | ER                | 2.67       | 2.01       |

Table 1: Proteins identified in the microscopy screen for proteins that induce extra SPBs when forcibly relocalised to the SPB. \* YJL021C overlaps the originally identified YJL020C ORF and so has been merged into YJL020C [Brachat et al., 2003], however the GFP strain shows a punctate fluorescent signal.

## 370 5 Discussion

### 371 5.1 Analysis of SPI screens

372 Z-transformations are a commonly used tool to analyse genome-wide screens, however their  
373 underlying assumption of normally distributed data means they can produce unreliable  
374 results, especially in screens identifying many hits. We developed empirical Bayes approach  
375 to address the shortcomings of Z-transformations. We developed tools including cutoffs  
376 based on the probability of inclusion which prove more effective in discriminating between  
377 screens with many hits. Notably, some hits in the Spc42 screen, such as Nup133 and  
378 Nup170, had LGRs which would have been considered insignificant according to the Z-score  
379 cutoff, but show a distinct phenotype. This shows that the lower cutoffs we propose can still  
380 be biologically relevant. Additionally, we developed a method to predict the validation rate  
381 of the screen with reasonable accuracy. These two metrics provide alternative viewpoints on  
382 the significance and strength of a given result within a screen. Furthermore, bimodal normal  
383 mixture models have 5 independent parameters, allowing for more effective parameterisation

384 of the distribution than the 2 parameters of a single normal distribution. These parameters  
385 can be used to compare the distribution of results from different screens, providing a way to  
386 understand the differences between SPI screens. Previous analysis of cell-wide SPI screens  
387 concluded that only a small proportion of proteins are sensitive to forced relocalization  
388 however our re-analysis of this data and the inclusion of the SPB in this dataset suggests  
389 that some regions of the cell are far more sensitive to forced relocalization of proteins across  
390 the proteome. The empirical Bayes approach provides the most utility in the cases where  
391 Z-transformations are least appropriate: when analysing screens with large numbers of hits.  
392 However, we did find that when the fitted standard deviation of Component 2 was too large,  
393 the screens validated poorly and the mixture model was inaccurate.

394 Mixture models allow for a quick and easy way to effectively parameterise screening  
395 distribution data, however they cannot provide perfect prediction with imperfect data.  
396 If greater levels of precision or reproducibility are necessary, further modifications to the  
397 experimental procedures would be required. Zackrisson and colleagues found significant  
398 variation in growth rates of colonies across a single plate and recommend local normalisation  
399 of colony size to account for these effects to improve reproducibility [Zackrisson et al.,  
400 2016]. Baryshnikova and colleagues found that “batch” effects, caused by subtle differences  
401 in, for example, media composition or incubator temperature, between plates grown at  
402 different times, caused significant variation in colony sizes [Baryshnikova et al., 2010]. While  
403 all plates in a SPI screen are generally grown concurrently, the validation screens were  
404 performed afterwards, once analysis of the screen has been performed. This may explain  
405 the high FPRs in validation of some screens. Baryshnikova and colleagues propose using  
406 linear discriminant analysis to compute “batch signatures” which could be used to limit  
407 batch effects. Finally, the precision of measurements could be improved by a methodology  
408 that directly correlates growth measurement to rate, for example by calculating a growth  
409 curve using automated scanning of plates at regular intervals [Zackrisson et al., 2016].

## 410 **5.2 SPB overduplication**

411 Our current understanding of the SPB duplication cycle of *S. cerevisiae* is that alternating  
412 activities of the CDK-cyclin complex and Cdc14 phosphatase are responsible for once-per-  
413 cycle duplication of the SPB [Rüthnick and Schiebel, 2018]. This model suggests that SPB  
414 duplication is initiated while Cdc14 activity is at its peak but may not be completed until  
415 CDK activity increases and Cdc14 activity decreases later in the cell cycle. It has been  
416 proposed that the SPB satellite is inserted into the nuclear membrane using molecular ma-  
417 chinery that is responsible for nuclear pore complex (NPC) insertion [Rüthnick and Schiebel,

418 2018]. We screened NPC proteins for SPBs with Spc42 and used fluorescence microscopy to  
419 estimate SPB number in these strains. We found evidence that the SPIN components, Bbp1  
420 and Mps2, and to a lesser extent Nbp1 and Ndc1, induced formation of additional SPBs  
421 when forcibly recruited to the SPB. We also found that the NPC components Nsp1, Nic96,  
422 Nup133, Nup170 and Pom34 produced similar effects. It is interesting that the deletion of  
423 either of two of the genes coding for these proteins, *NIC96* and *POM34*, were identified as  
424 suppressors of SPB duplication defects caused by *mps3-1 spo7Δ* mutation [Witkin et al.,  
425 2010]. This finding suggests that in their wild type localization, these proteins inhibited  
426 SPB duplication, possibly by competing for binding partners, whereas our data suggests  
427 that when forced to the SPB, these proteins can induce the overduplication of SPBs. Ad-  
428 ditionally, we found evidence that the, as yet, unclassified proteins encoded by YJL021C,  
429 YPR071W, YPR114W and YDL121C as well as Apq12 similarly induce extra Spc42 foci  
430 indicative of SPB overduplication. There are several interpretations of these findings, which  
431 may apply to some or all of the phenotypes observed. Firstly, it is possible that the RFP  
432 foci observed may represent aggregates of Spc42-GBP-RFP that do not contain other SPB  
433 proteins or function as MTOCs. It is worth remarking that in a systematic study of local-  
434 ization of target and query proteins, a small proportion were found to localise to a region  
435 of the cell where neither would localise in wild type cells [Berry et al., 2016]. Secondly, it  
436 may be that forced recruitment of these proteins induce SPB overduplication through the  
437 documented SPB duplication pathway. This would require detachment of this process from  
438 the once-per-cycle regulation via CDK-cyclin and Cdc14. This could be explained if some  
439 aspects of this process were initiated by the presence of these proteins at the SPB, which  
440 were in turn induced by CDK-cyclin or Cdc14. Finally, it may be the case that targeting  
441 Spc42 to other structures in the cell, especially the NPC, can lead to the creation of de  
442 novo SPBs. The current model of SPB duplication suggests that SPBs assemble from a  
443 satellite formed of Spc42, Nud1, Cnm67 and Spc29 [Fu et al., 2015]. It may be that small  
444 amount of Spc42 are recruited to the NPC in these strains, and that these seed the creation  
445 of SPBs in a manner completely distinct from regular SPB duplication. Witkin et al. [2010]  
446 proposed an *MPS3* independent SPB duplication pathway and it may be this or some other  
447 pathway that is responsible for this phenotype.

448 Further work is required to distinguish these models, in particular, assessment of the  
449 foci for presence of other SPB proteins and functionality of the foci as MTOCs is required  
450 to confirm them as real SPBs. If SPBs are created de novo we would expect that these  
451 strains would lose the requirement for proteins with an essential role in SPB duplication,  
452 such as Cdc31 [Rüthnick and Schiebel, 2016]. Many mutants have been identified that

453 fail to duplicate their SPBs, for example the original MPS (Mono-Polar Spindle) genes  
454 [Winey et al., 1991] however there are fewer cases of genetic perturbations that lead to SPB  
455 overduplication. One example is the *sfi1-C4A* mutation [Avena et al., 2014], however this  
456 leads to SPB separation defects as well as SPB overduplication. The development of strains  
457 which reproducibly produce extra SPBs and multi-polar spindles will allow for the use of  
458 yeast models to explore the impact of these structures in cancers.

## 459 **6 Acknowledgements**

460 The authors acknowledge funding from the Francis Crick Institute, which receives its  
461 core funding from Cancer Research UK (FC001003), the UK Medical Research Council  
462 (FC001003), the Wellcome Trust (FC001003). We thank L Berry, G Ólafsson, P Bates, F  
463 Caudron, S Santos, W Taylor, U Eggert, J Difley and the Genomics Equipment Park STP  
464 (The Francis Crick Institute). The authors declare no competing financial interests.

## 465 **References**

- 466 C. Arquint, A.-M. Gabryjonczyk, and E. A. Nigg. Centrosomes as signalling centres. *Philo-*  
467 *sophical transactions of the Royal Society of London. Series B, Biological sciences*, 369  
468 (1650):20130464–20130464, Sept. 2014.
- 469 J. S. Avena, S. Burns, Z. Yu, C. C. Ebmeier, W. M. Old, S. L. Jaspersen, and M. Winey.  
470 Licensing of Yeast Centrosome Duplication Requires Phosphoregulation of Sfi1. *PLOS*  
471 *Genetics*, 10(10):e1004666–10, Oct. 2014.
- 472 E. L. Barnhart, R. K. Dorer, A. W. Murray, and S. C. Schuyler. Reduced Mad2 expression  
473 keeps relaxed kinetochores from arresting budding yeast in mitosis. *Molecular Biology of*  
474 *the Cell*, 22(14):2448–2457, July 2011.
- 475 A. Baryshnikova, M. Costanzo, Y. Kim, H. Ding, J. Koh, K. Toufighi, J.-Y. Youn, J. Ou,  
476 B.-J. San Luis, S. Bandyopadhyay, M. Hibbs, D. Hess, A.-C. Gingras, G. D. Bader,  
477 O. G. Troyanskaya, G. W. Brown, B. Andrews, C. Boone, and C. L. Myers. Quantitative  
478 analysis of fitness and genetic interactions in yeast on a genome scale. *Nature Methods*,  
479 7(12):1017–1024, Nov. 2010.
- 480 Y. Benjamini and Y. Hochberg. Controlling the False Discovery Rate: A Practical and  
481 Powerful Approach to Multiple Testing. *Journal of the Royal Statistical Society. Series*  
482 *B Methodological*, 57(1):289–300, Oct. 1995.

- 483 L. K. Berry, G. Ólafsson, E. Ledesma-Fernandez, and P. H. Thorpe. Synthetic protein  
484 interactions reveal a functional map of the cell. *eLife*, 5:e13053–17, Apr. 2016.
- 485 S. Brachat, F. S. Dietrich, S. Voegeli, Z. Zhang, L. Stuart, A. Lerch, K. Gates, T. Gaffney,  
486 and P. Philippsen. Reinvestigation of the *Saccharomyces cerevisiae* genome annotation  
487 by comparison to the genome of a related fungus: *Ashbya gossypii*. *Genome biology*, 4  
488 (7):R45, 2003.
- 489 A. K. Caydasi, A. Khmelinskii, R. Duenas-Sanchez, B. Kurtulmus, M. Knop, and G. Pereira.  
490 Temporal and compartment-specific signals coordinate mitotic exit with spindle position.  
491 *Nature Communications*, 8:14129, Jan. 2017.
- 492 J. C. Dittmar, R. J. Reid, and R. Rothstein. ScreenMill: a freely available software suite for  
493 growth measurement, analysis and visualization of high-throughput screen data. *BMC*  
494 *Bioinformatics*, 11(1):353, June 2010.
- 495 E. Eden, R. Navon, I. Steinfeld, D. Lipson, and Z. Yakhini. GOrilla: a tool for discovery  
496 and visualization of enriched GO terms in ranked gene lists. *BMC Bioinformatics*, 10(1):  
497 48–7, 2009.
- 498 B. Efron. Large-Scale Simultaneous Hypothesis Testing. *Journal of the American Statistical*  
499 *Association*, 99(465):96–104, Mar. 2004.
- 500 M. B. Eisen, P. T. Spellman, P. O. Brown, and D. Botstein. Cluster analysis and display  
501 of genome-wide expression patterns. *Proceedings of the National Academy of Sciences*,  
502 95(25):14863–14868, Dec. 1998.
- 503 C. Fraley and A. E. Raftery. Model-Based Clustering, Discriminant Analysis, and Density  
504 Estimation. *Journal of the American Statistical Association*, 97(458):611–631, June 2002.
- 505 J. Fu, I. M. Hagan, and D. M. Glover. The Centrosome and Its Duplication Cycle. *Cold*  
506 *Spring Harbor Perspectives in Biology*, 7(2):a015800, Feb. 2015.
- 507 G. Giaever, A. M. Chu, L. Ni, C. Connelly, L. Riles, S. Véronneau, S. Dow, A. Lucau-  
508 Danila, K. Anderson, B. André, A. P. Arkin, A. Astromoff, M. El-Bakkoury, R. Bangham,  
509 R. Benito, S. Brachat, S. Campanaro, M. Curtiss, K. Davis, A. Deutschbauer, K.-D.  
510 Entian, P. Flaherty, F. Foury, D. J. Garfinkel, M. Gerstein, D. Gotte, U. Güldener, J. H.  
511 Hegemann, S. Hempel, Z. Herman, D. F. Jaramillo, D. E. Kelly, S. L. Kelly, P. Kötter,  
512 D. LaBonte, D. C. Lamb, N. Lan, H. Liang, H. Liao, L. Liu, C. Luo, M. Lussier, R. Mao,  
513 P. Ménard, S. L. Ooi, J. L. Revuelta, C. J. Roberts, M. Rose, P. Ross-Macdonald,  
514 B. Scherens, G. Schimmack, B. Shafer, D. D. Shoemaker, S. Sookhai-Mahadeo, R. K.



- 515 Storms, J. N. Strathern, G. Valle, M. Voet, G. Volckaert, C.-y. Wang, T. R. Ward,  
516 J. Wilhelmy, E. A. Winzeler, Y. Yang, G. Yen, E. Youngman, K. Yu, H. Bussey, J. D.  
517 Boeke, M. Snyder, P. Philippsen, R. W. Davis, and M. Johnston. Functional profiling of  
518 the *Saccharomyces cerevisiae* genome. *Nature*, 418(6896):387–391, July 2002.
- 519 Y. Gryaznova, A. K. Caydasi, G. Malengo, and V. Sourjik. A FRET-based study reveals  
520 site-specific regulation of spindle position checkpoint proteins at yeast centrosomes. *eLife*,  
521 5, 2016.
- 522 W.-K. Huh, J. V. Falvo, L. C. Gerke, A. S. Carroll, R. W. Howson, J. S. Weissman, and  
523 E. K. OShea. Global analysis of protein localization in budding yeast. *Nature*, 425(6959):  
524 686–691, Oct. 2003.
- 525 S. L. Jaspersen and S. Ghosh. Nuclear envelope insertion of spindle pole bodies and nuclear  
526 pore complexes. *Nucleus*, 3(3):226–236, May 2012.
- 527 S. L. Jaspersen and M. Winey. The budding yeast spindle pole body: structure, duplication,  
528 and function. *Annual review of cell and developmental biology*, 20:1–28, 2004.
- 529 M. A. Mena, T. P. Treynor, S. L. Mayo, and P. S. Daugherty. Blue fluorescent proteins  
530 with enhanced brightness and photostability from a structurally targeted library. *Nature*  
531 *Biotechnology*, 24(12):1569–1571, Nov. 2006.
- 532 E. A. Nigg. Origins and consequences of centrosome aberrations in human cancers. *Inter-*  
533 *national Journal of Cancer*, 119(12):2717–2723, 2006.
- 534 G. Ólafsson and P. H. Thorpe. Synthetic physical interactions map kinetochore regulators  
535 and regions sensitive to constitutive Cdc14 localization. *Proceedings of the National*  
536 *Academy of Sciences*, 112(33):10413–10418, Aug. 2015.
- 537 G. Ólafsson and P. H. Thorpe. Synthetic Physical Interactions Map Kinetochore-Checkpoint  
538 Activation Regions. *G3 (Bethesda, Md.)*, 6(8):2531–2542, Aug. 2016.
- 539 G. Ólafsson and P. H. Thorpe. Rewiring the Budding Yeast Proteome using Synthetic  
540 Physical Interactions. In *Genome Instability*, pages 599–612. Humana Press, New York,  
541 NY, New York, NY, 2018.
- 542 R. J. D. Reid, S. Gonzalez-Barrera, I. Sunjevaric, D. Alvaro, S. Ciccone, M. Wagner, and  
543 R. Rothstein. Selective ploidy ablation, a high-throughput plasmid transfer protocol,  
544 identifies new genes affecting topoisomerase I-induced DNA damage. *Genome Research*,  
545 21(3):477–486, Mar. 2011.

- 546 U. Rothbauer, K. Zolghadr, S. Tillib, D. Nowak, L. Schermelleh, A. Gahl, N. Backmann,  
547 K. Conrath, S. Muyldermans, M. C. Cardoso, and H. Leonhardt. Targeting and tracing  
548 antigens in live cells with fluorescent nanobodies. *Nature Methods*, 3(11):887–889, Oct.  
549 2006.
- 550 D. Rüttnick and E. Schiebel. Duplication of the Yeast Spindle Pole Body Once per Cell  
551 Cycle. *Molecular and Cellular Biology*, 36(9):1324–1331, Apr. 2016.
- 552 D. Rüttnick and E. Schiebel. Duplication and Nuclear Envelope Insertion of the Yeast  
553 Microtubule Organizing Centre, the Spindle Pole Body. *Cells*, 7(5), May 2018.
- 554 A. J. Saldanha. Java Treeview—extensible visualization of microarray data. *Bioinformatics*,  
555 20(17):3246–3248, Nov. 2004.
- 556 I. Scarfone and S. Piatti. Coupling spindle position with mitotic exit in budding yeast: The  
557 multifaceted role of the small GTPase Tem1. *Small GTPases*, 6(4):196–201, Oct. 2015.
- 558 J. Schafer and K. Strimmer. An empirical Bayes approach to inferring large-scale gene  
559 association networks. *Bioinformatics*, 21(6):754–764, Mar. 2005.
- 560 L. Scrucca, M. Fop, T. B. Murphy, and A. E. Raftery. mclust 5: Clustering, Classification  
561 and Density Estimation Using Gaussian Finite Mixture Models. *The R journal*, 8(1):  
562 289–317, Aug. 2016.
- 563 J. M. Tkach, A. Yimit, A. Y. Lee, M. Riffle, M. Costanzo, D. Jaschob, J. A. Hendry, J. Ou,  
564 J. Moffat, C. Boone, T. N. Davis, C. Nislow, and G. W. Brown. Dissecting DNA damage  
565 response pathways by analysing protein localization and abundance changes during DNA  
566 replication stress. *Nature Cell Biology*, 14(9):966–976, July 2012.
- 567 M. Winey, L. Goetsch, P. Baum, and B. Byers. MPS1 and MPS2: novel yeast genes  
568 defining distinct steps of spindle pole body duplication. *The Journal of Cell Biology*, 114  
569 (4):745–754, Aug. 1991.
- 570 K. L. Witkin, J. M. Friederichs, O. Cohen-Fix, and S. L. Jaspersen. Changes in the nuclear  
571 envelope environment affect spindle pole body duplication in *Saccharomyces cerevisiae*.  
572 *Genetics*, 186(3):867–883, Nov. 2010.
- 573 J. Wong, Y. Nakajima, S. Westermann, C. Shang, J.-S. Kang, C. Goodner, P. Houshmand,  
574 S. Fields, C. S. M. Chan, D. Drubin, G. Barnes, and T. Hazbun. A protein interaction  
575 map of the mitotic spindle. *Molecular Biology of the Cell*, 18(10):3800–3809, Oct. 2007.

576 M. Zackrisson, J. Hallin, L.-G. Ottosson, P. Dahl, E. Fernandez-Parada, E. Ländström,  
577 L. Fernandez-Ricaud, P. Kaferle, A. Skyman, S. Stenberg, S. Omholt, U. Petrovič,  
578 J. Warringer, and A. Blomberg. Scan-o-matic: High-Resolution Microbial Phenomics  
579 at a Massive Scale. *G3 (Bethesda, Md.)*, 6(9):3003–3014, Sept. 2016.

580 **7 Figures**

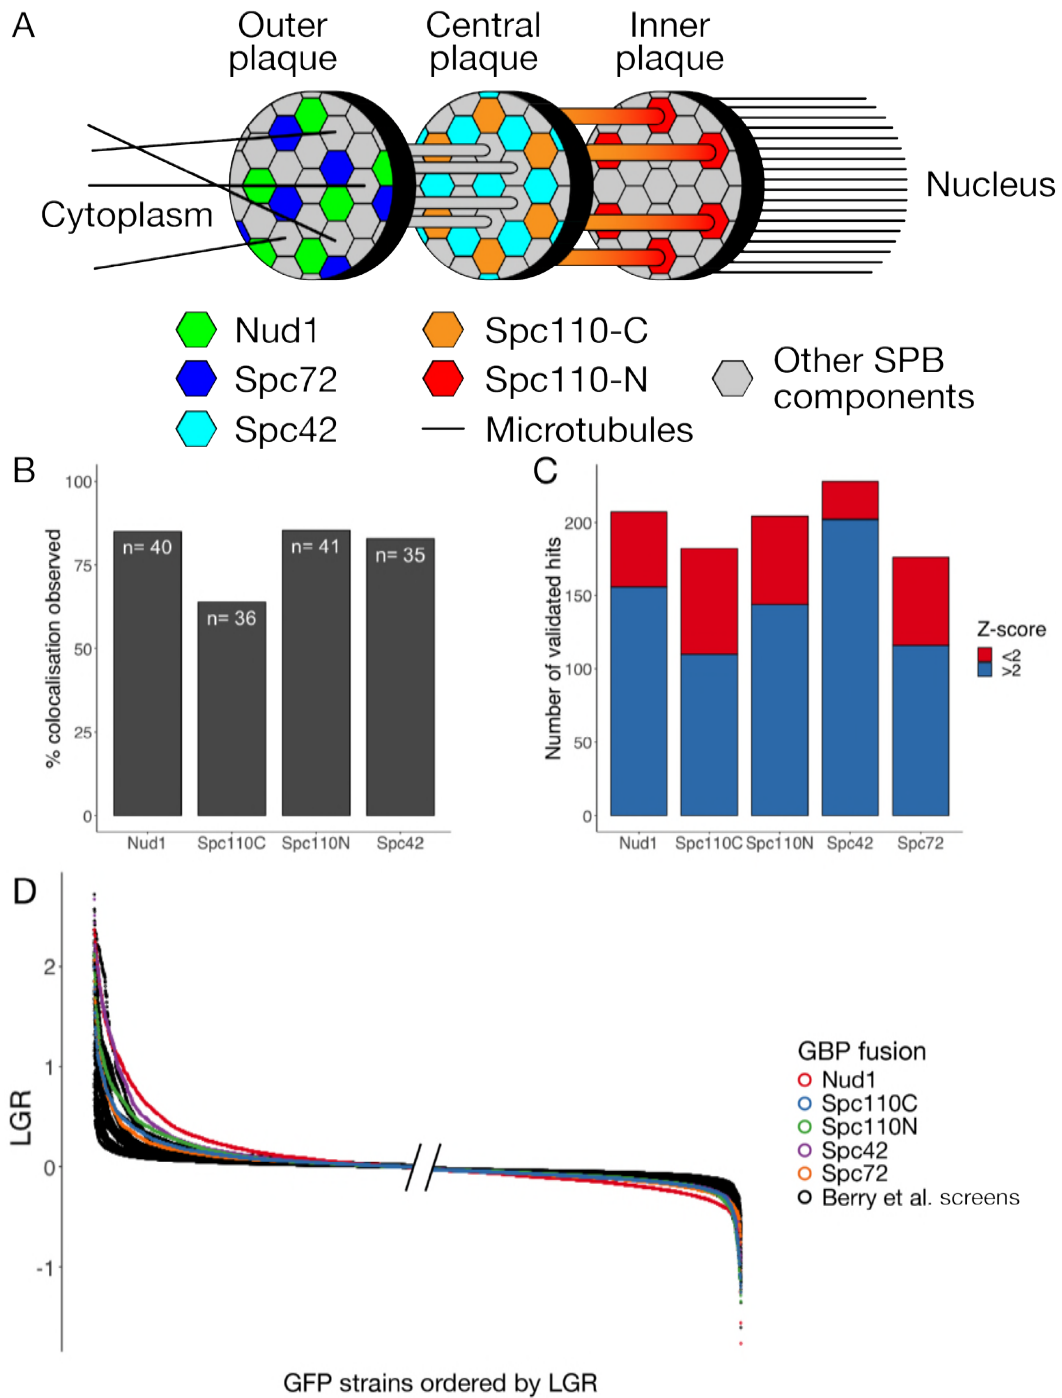

---

Figure 1 (*previous page*): A: Structure of the SPB showing location of GBP tags used. B: Colocalization of query and target proteins in the Nud1, Spc42, Spc110C and Spc110N screens. A selection of 48 GFP strains were chosen to represent different regions of the cell and a mixture of strong and weak growth phenotypes. Each strain was judged to have either colocalization of GFP and RFP at SPB foci or not. In some cases no live cells were imaged due to slow growth, these strains were removed from analysis. The 60% – 80% colocalization observed in each screen is consistent with previous studies [Berry et al., 2016]. C: Validation of SPB SPI screens. For each GBP construct, 240 GFP strains were chosen and rescreened at higher density. These strains were considered to be validated hits if the growth defect measured was greater than a cutoff determined by GFP-free controls. In each screen, we found that strains with Z-scores less than 2 met the criteria for validation, suggesting the cutoff at a Z-score of 2 was overly restrictive. D: Ordered LGRs for each of the 5 SPB screens and 23 screens from Berry et al. [2016], this graph shows only strains present in the subset of the GFP library used in the SPB screens. The left hand side of the graph has left-justified values while the right hand side shows the right-justified values, this is because the region closest to the edges is the most informative. The SPB screens, shown in colour, are considerably separated from the screens performed with other regions of the cell.

581 **Supplementary Information - Figure 1**

582 • fig1 - colocalization.xlsx

583 • fig1 - all screen LGRs.xlsx

584 • fig1 - validation.xlsx

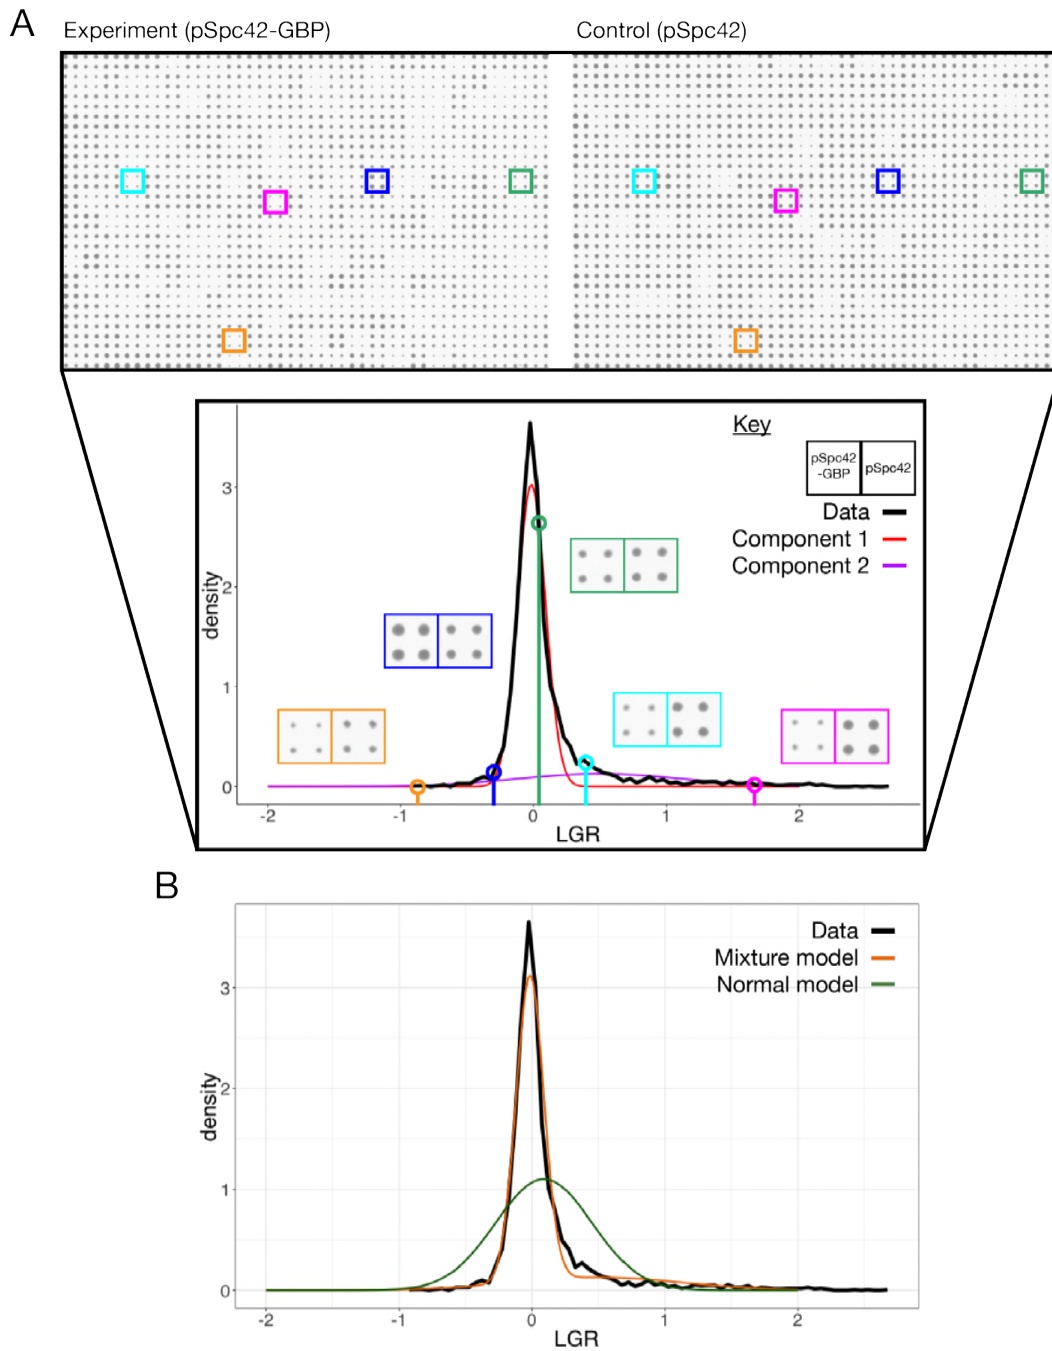

Figure 2: A: Schematic of the mixture model analysis of SPI screen data for the Spc42 screen. The top panel shows scans of a single library plate with the plasmid expressing either Spc42-GBP-RFP (denoted Spc42-GBP) or Spc42 (the plate with the plasmid expressing GBP alone is not shown). The lower panel shows a histogram of LGRs in the screen, with two normal components of the mixture model shown in colour. Five strains are highlighted to show the difference in colony size associated with different LGRs. Note that strains with low negative LGRs, such as that shown in orange are often the results of slow-growing GFP strains, which can register as having enhanced growth due to plate normalization and proportionally high levels of measurement error. B: Comparison of the bimodal normal mixture model and normal model of the Spc42 screen data, with the histogram of measured LGRs.

585 **Supplementary Information - Figure 2**

586 • fig2 - MM methods.pdf

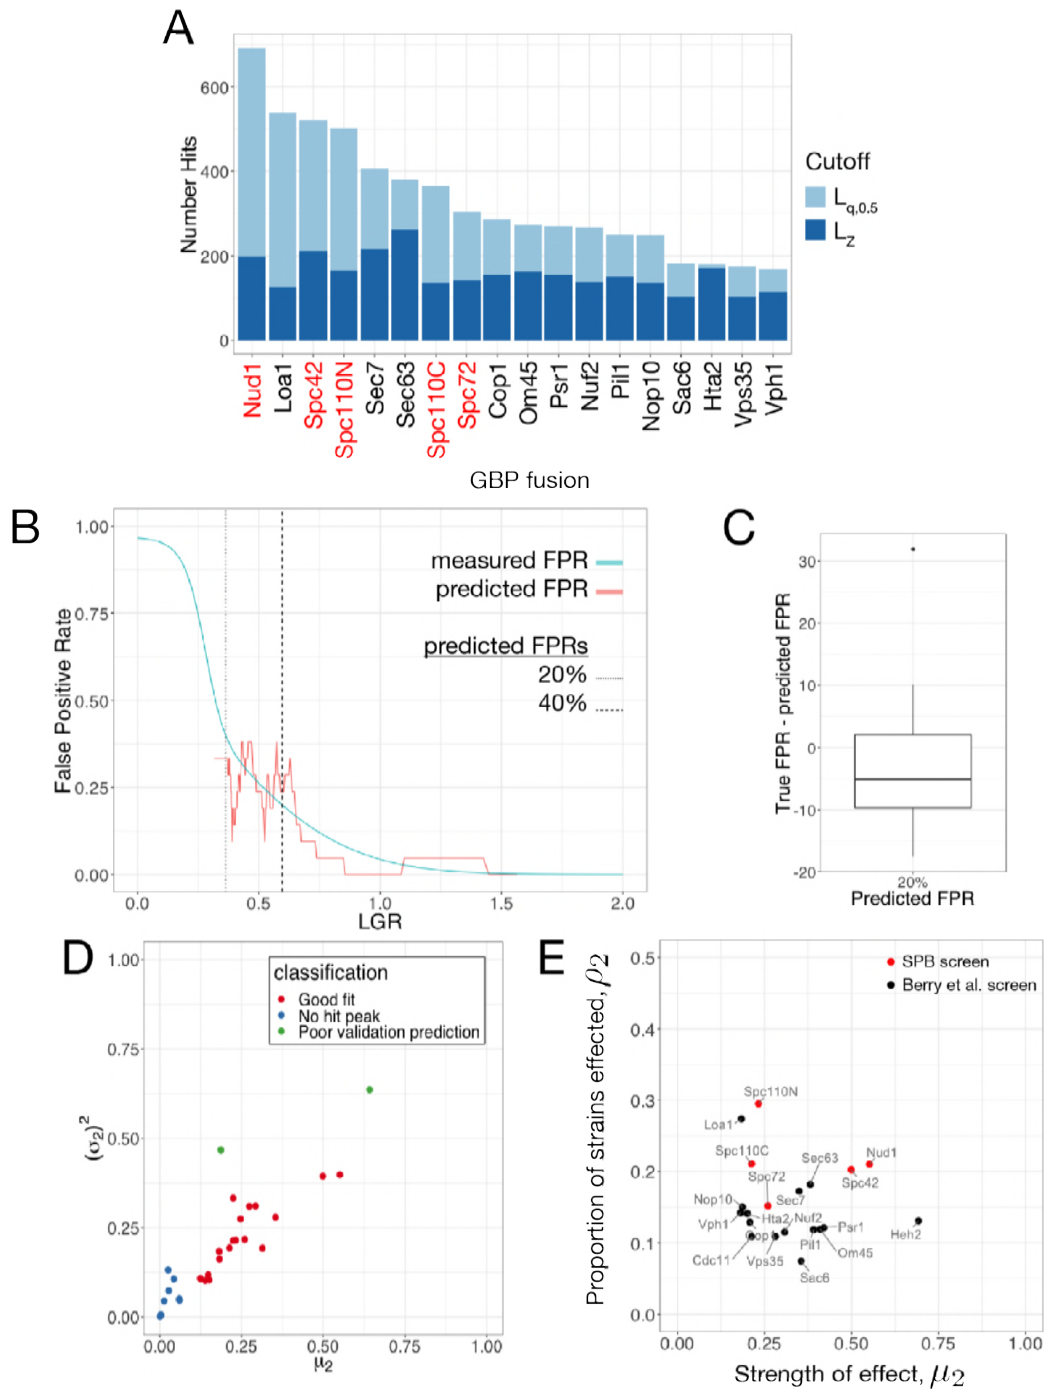

---

Figure 3 (*previous page*): A: The number of hits by both Z-score ( $L_Z$ ) and q(x) ( $L_{q,0.5}$ ) cutoff for each of the screens where the mixture model was applicable. The q(x) cutoff has a higher dynamic range than the Z-score and is better able to distinguish screens with many hits. The SPB screens are among those with the greatest numbers of hits. B: FPR prediction for the Spc72 screen. The FPR for the screen was predicted from the mixture model and this prediction is overlaid with estimates of the FPR using binned data from the validation screen. In this case, the predicted FPR was reasonably accurate, although the data is quite noisy. The points where the mixture model predicts 20% and 40% FPR are indicated with a dashed line. C: Box-and-whisker plot showing the difference between measured and predicted FPR at the point where the FPR is predicted to be 20% across the screens where the mixture model was applicable. This shows some bias, with the predicted FPR generally higher than the true FPR but generally achieving an accuracy around  $\pm 10\%$ . D: Classification of mixture model fit for each of the 28 screens analyzed. The mean  $\mu_2$  and variance  $(\sigma_2)^2$  of component 2 are good indicators of the success of the model with very low means or high variances indicative of the lack of a hit peak or poor validation prediction respectively. E: Classification of screen based on fitted parameters calculated using the subset of GFP strains used in the SPB screen. Each of the screens for which the mixture model fit was appropriate are plotted according to the proportion of strains affected ( $\rho_2$ ) and the average strength of these effects ( $\mu_2$ ). The SPB screens Spc42 and Nud1 are positioned in the upper right portion of the graph, showing that a large proportion of proteins were sensitive to forced interaction with the SPB and these sensitivities caused significant growth defects.

587 **Supplementary Information - Figure 3**

588 • fig3 - MMdata.xlsx

589 • fig3 - MMdata(GBlibrary).xlsx



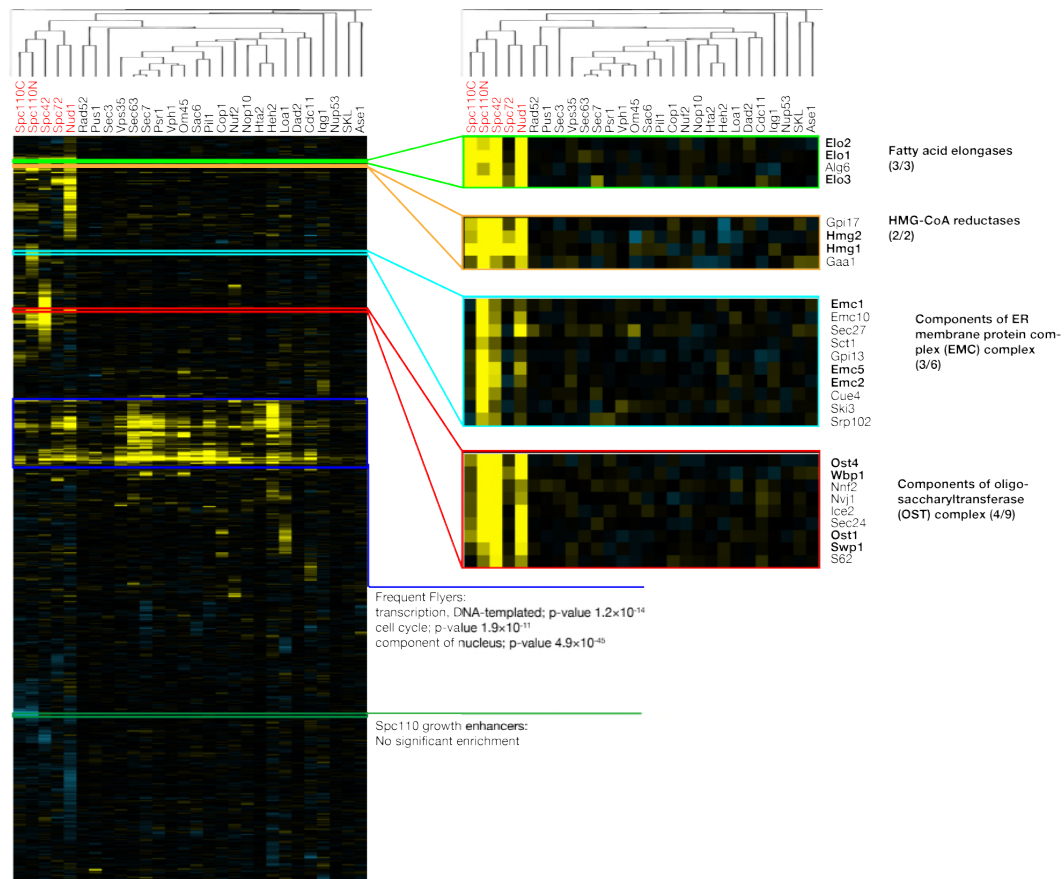

590 **Supplementary Information - Figure 4**

591 None.

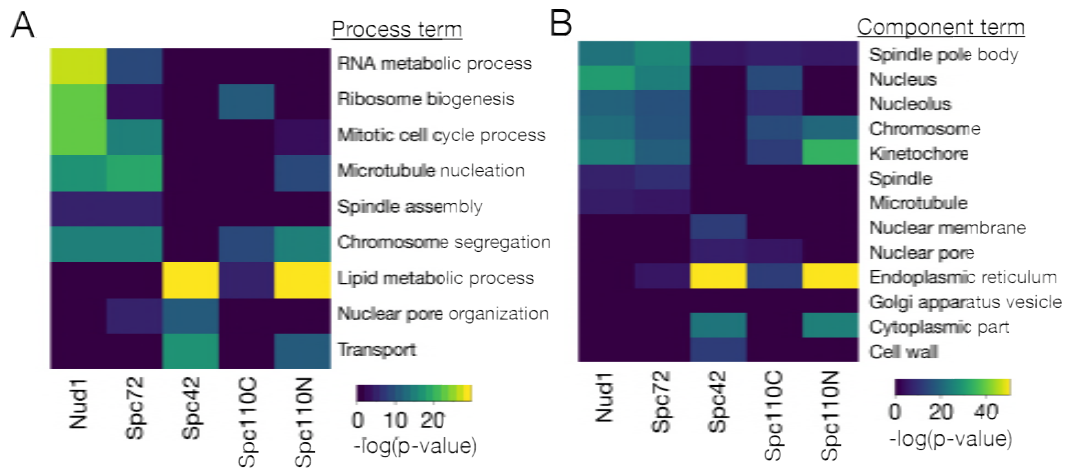

Figure 5: GO analysis of SPB SPI screens. A: Heatmap of process GO analysis, dark blue tiles represent no significant enrichment while the lighter colours represent significant enrichment, with warmer tones representing higher p-values. B: Heatmap of component GO analysis.

592 **Supplementary Information - Figure 5**

593 • fig5 - LipidGOanalysis.png

594 • fig5 - GOenrichment.xlsx

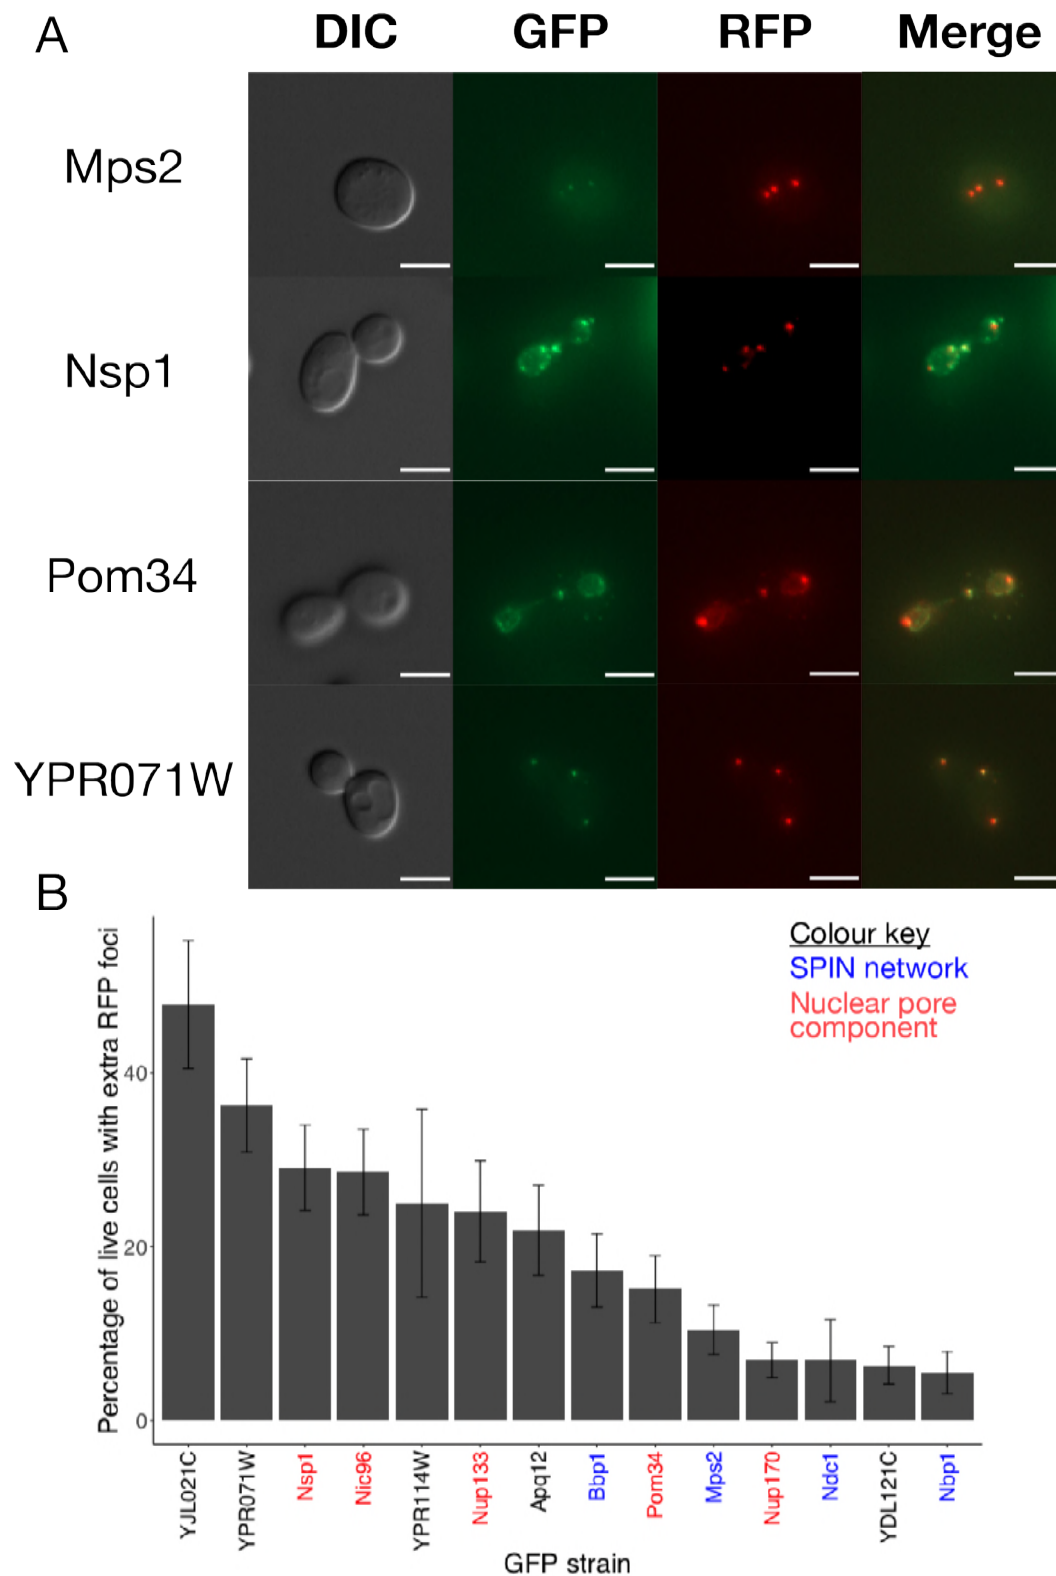

Figure 6: The plasmid encoding Spc42-GBP-RFP was directly transformed into the GFP strains identified in the screen for SPB number aberrations. A: Representative images of Mps2, Nsp1, Pom34 and YPR071W -GFP strains, each showing more than two RFP foci, interpreted as indicative of overduplication of SPBs. All scale bars are  $5\mu\text{m}$ . B: Quantification of the microscopy analysis, with key proteins highlighted, error bars show binomial standard error. Three images were captured for each strain and the percentage of living cells showing more than two RFP foci was calculated. Note that even relatively small percentages may be of interest as SPB overduplication is never observed in wild type cells.

595 **Supplementary Information - Figure 6**

- 596 • fig6 - allmicro1.png
- 597 • fig6 - allmicro2.png
- 598 • fig6 - microscopy screen.xlsx
- 599 • fig6 - phenotype quantification.xlsx

Table 2: Table of plasmids

| Plasmid Name | Genotype              | Selection |
|--------------|-----------------------|-----------|
| pHT4         | <i>GBP</i>            | Leu\Amp   |
| pHT11        | <i>SPC42-GBP-RFP</i>  | Leu\Amp   |
| pHT297       | <i>SPC42</i>          | Leu\Amp   |
| pHT575       | <i>SPC110-GBP-RFP</i> | Leu\Amp   |
| pHT576       | <i>GBP-RFP-SPC110</i> | Leu\Amp   |
| pHT577       | <i>SPC110</i>         | Leu\Amp   |
| pHT584       | <i>NUD1-GBP-RFP</i>   | Leu\Amp   |
| pHT585       | <i>NUD1</i>           | Leu\Amp   |
| pHT615       | <i>SPC72</i>          | Leu\Amp   |
| pHT616       | <i>SPC72-GBP-RFP</i>  | Leu\Amp   |
| pHT706       | <i>HTB2-AZURITE</i>   | Nat\Amp   |

600 **8 Supplementary Figures**

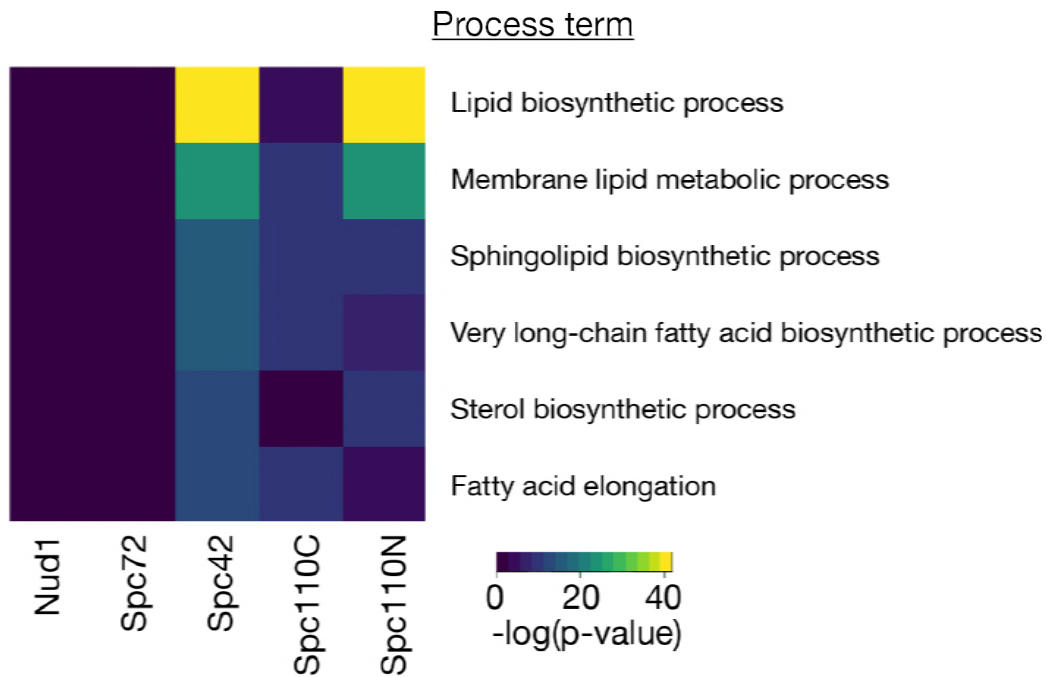

Figure S5: Heatmap of GO enrichment analysis for lipid process terms.

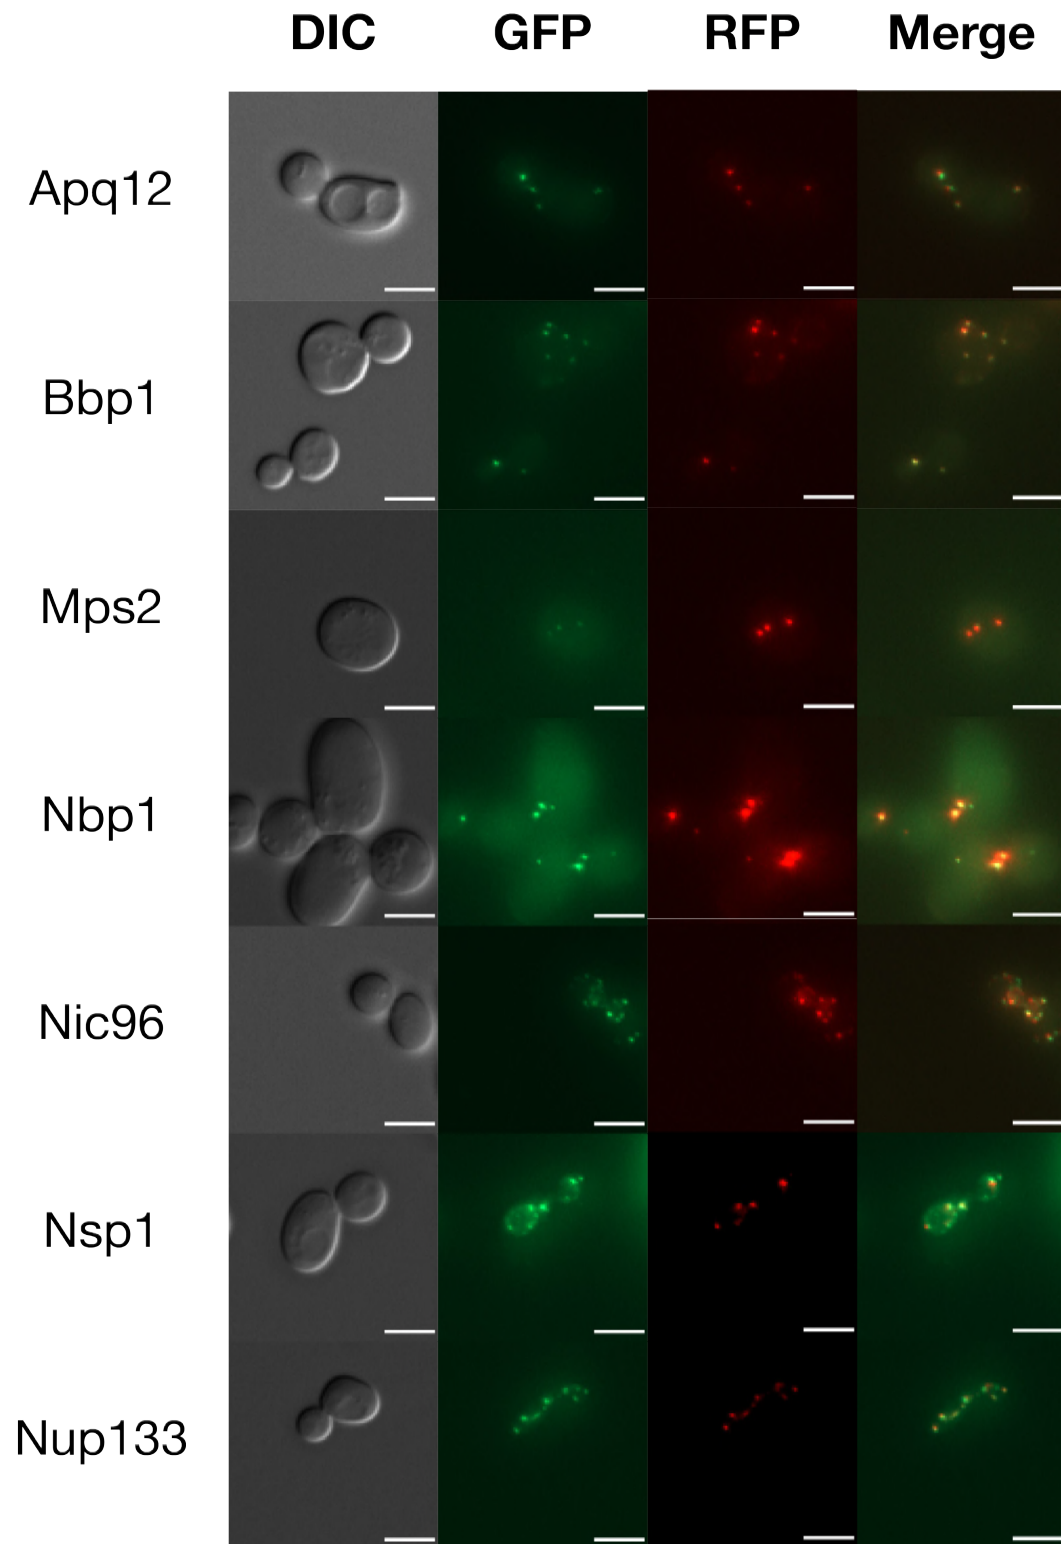

Figure S6

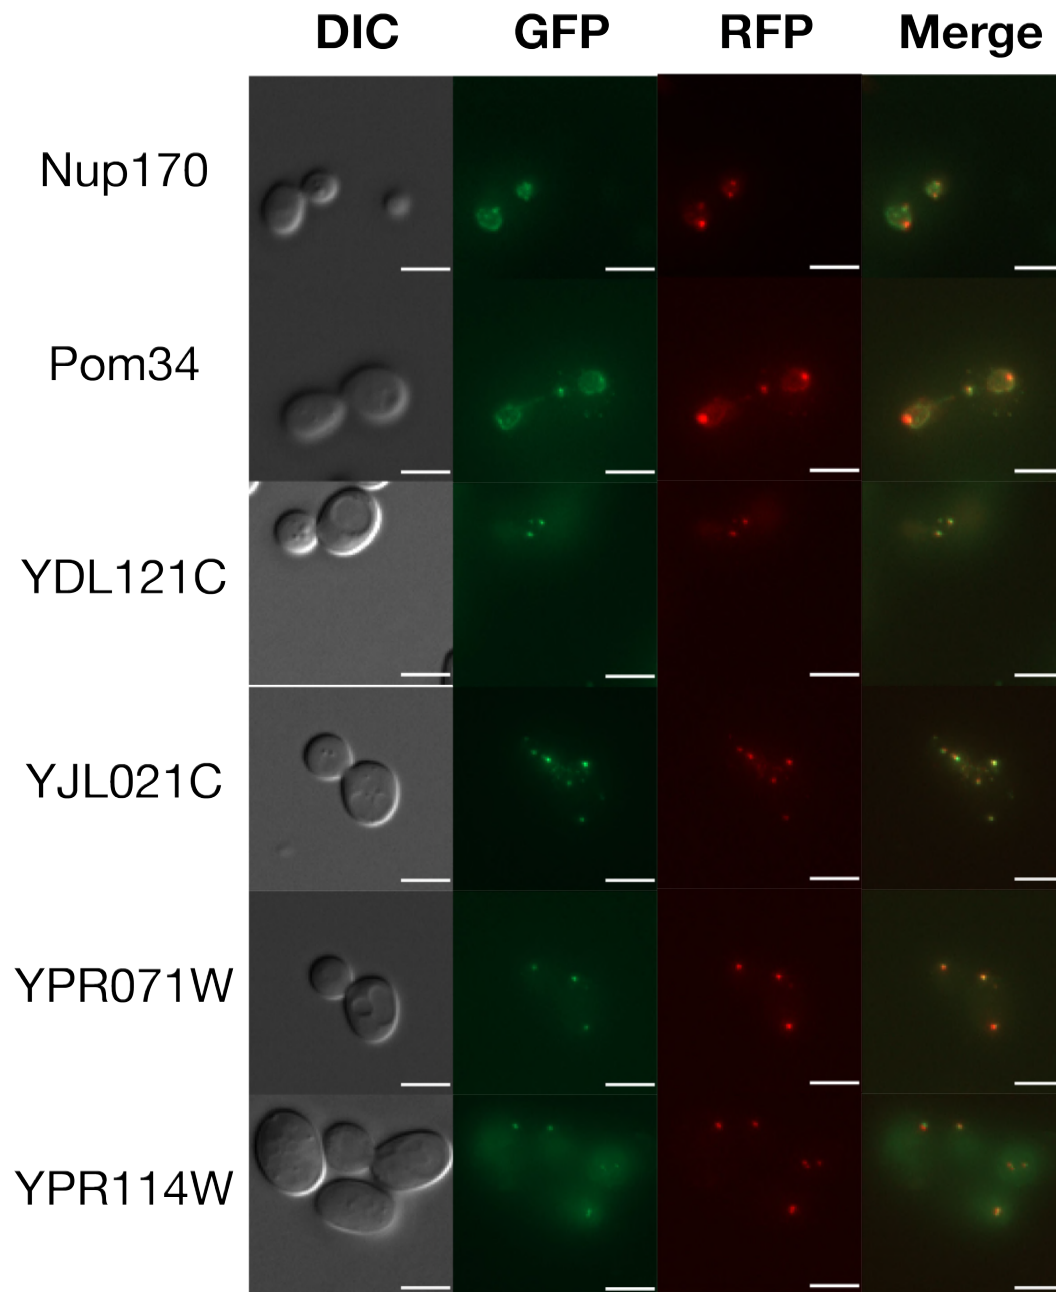

Figure S6: Representative images of each of the GFP strains investigated, each showing more than two RFP foci, interpreted as indicative of overduplication of SPBs. All scale bars are 5 $\mu$ m.

## 1 **Supplementary Methods**

### 2 **Theory**

3 Mixture models have been proposed as an alternative to calculating p-values based on the assumption  
4 that data is normally distributed Efron [2004] and have previously been used to analyse genome-wide  
5 datasets. The theory behind their use is that genome-wide screens are conducted in order to identify  
6 genes involved in a given process and that this divides the genome into two categories: those that are  
7 involved in this process (hits) and those that aren't. Typically, non-hits will have a normal distribution  
8 centred around 0, due to variation caused by inherent noise in the system. In contrast, measurement  
9 of each of the hits can be thought of as a sample of a normal distribution with mean (and potentially  
10 variance) determined by the individual hit, the combination of these hits will form a distribution with  
11 properties that will depend on the biology of the screen. The aim of analysing genome-wide screen data  
12 is to distinguish these two categories. If there are few enough hits, they will simply form a tail at the  
13 edge of the distribution of non-hits and will not significantly effect the mean or standard deviation of the  
14 overall distribution. However, when there are significant numbers of hits, they will effect these summary  
15 statistics and a fitted normal distribution is unlikely to accurately reflect the real distribution of non-  
16 hits. This will render methods based on this approximation, such as the calculation of p-values and  
17 application of Z-transformations, inaccurate. The mixture model approach attempts to overcome this  
18 limitation by directly identifying the distribution of each of the two categories. Efron's original method  
19 [Efron, 2004] involved fitting a normal component to the central peak of the data, representing non-hits,  
20 based on the shape of this peak. He then estimated the distribution of the hit peak from the difference  
21 between the overall distribution and the fitted null distribution. A limitation of this approach is that  
22 the null model is fitted to a relatively small region of the distribution of non-hits and furthermore, it  
23 gives no information about the distribution of the hits. In our approach, we fitted two normal modes to  
24 the data, using an Expectation-Maximization (ME) algorithm, which iteratively improves the fit of the  
25 model based on the likelihood of the generating the observed data from the given model. This means all  
26 of the data is used to fit the model and the end result is a parameterised model of the distribution of  
27 the hits which can be used to compare different genome-wide screens.

### 28 **Fitting**

29 We fit two-peak normal mixture models to the smoothed LGR data for each of the screens, using the  
30 Mclust package Scrucca et al. [2016], which uses an ME algorithm to fit the model. The model fitting  
31 process yields 6 parameters:  $\rho_1, \rho_2, \mu_1, \mu_2, \sigma_1, \sigma_2$  which fully define the mixture model. A table of all  
32 parameters of fitted models is included in the supplementary materials.

### 33 Peak Identification

34 After fitting, we distinguished two types of fit: good fits that had two clearly defined distributions  
35 representing hits and non-hits; and poor fits where the distributions were not clearly defined. These  
36 poor fits were defined as those in which

$$\mu_2 < \mu_1 + 1.5\sigma_1,$$

37 these screens were excluded from further analysis with mixture models. In the remaining 20 cases  
38 where the fit was good, we identified the “hit peak” as the peak shifted furthest to the right and the  
39 distribution of non-hits, or “central peak” as the leftmost distribution. We refer to these two components  
40 of the distribution as  $C_1$  for the central peak and  $C_2$  for the hit peak. We can consider the genome-  
41 wide screen as a process for assigning LGRs to particular genes, the first step of this process is to decide  
42 whether the gene is a hit or not, which is a Bernoulli variable or weighted coin flip, where the probability  
43 of being a hit is given by  $\rho_2$ . Then a gene  $G_i$  has identity  $I_i$  given by:

$$\mathbb{P}(I_i = C_k) = \begin{cases} \rho_1, & k = 1 \\ \rho_2, & k = 2 \end{cases}.$$

44 Once the identity is determined, the measured LGR,  $LGR_i$ , is assigned as a normal variable distributed  
45 with mean and standard deviation  $\mu_1, \sigma_1$  or  $\mu_2, \sigma_2$  as determined by the category in which the gene was  
46 placed.

47 We wanted to define metrics to inform about the significance of results. In some cases we wish to  
48 draw a line that distinguishes LGRs from hits and non-hits and these metrics allow for such definitions.  
49 While cutoffs are a widely used tool and help to focus on significant results, they will always be to some  
50 extent arbitrary, as cases on the border may be placed either side by chance. On top of this, the strength  
51 of the interaction will vary depending on the particular genes, and depending on the application we may  
52 want only strong hits or we may want to include more subtle phenotypes. Therefore we propose different  
53 metrics to give a fuller picture of the data and so that a relevant metric can be chosen depending on  
54 context.

### 55 p-value and Adjustments

56 The central peak of the distribution provides a natural null model for the data and this can be used to  
57 calculate a p-value for a given LGR,  $x$ :

$$p(x) = \mathbb{P}(LGR_i > x | I_i = C_1) = \int_x^\infty f_{LGR_i | I_i = C_1}(z) dz,$$



58 where  $f_X(x)$  represents the probability distribution function of the random variable  $X$ . This value gives  
59 a measure of the probability that a given LGR would have been measured if the identity of gene  $G_i$   
60 was the central peak  $C_1$ . Genome-wide screens test multiple hypotheses so we may adjust the p-values  
61 to account for this, using for example either Bonferroni or FDR q-value adjustments [Benjamini and  
62 Hochberg, 1995]. A p-value of 0.05 is generally considered to be the cutoff for significance.

### 63 Probability of Inclusion

64 As the intention of a genome-wide screen is to distinguish hits from non-hits, rather than considering  
65 the p-value we can consider the probability of inclusion in a given category. For a given LGR,  $x$ , the  
66 probability of inclusion in Component 2 is:

$$q(x) = \mathbb{P}(I_i = C_2 | LGR_i = x).$$

67 By Bayes' theorem

$$q(x) = \frac{f_{LGR_i|I_i=C_2}(x)\mathbb{P}(I_i = C_2)}{f_{LGR_i}(x)},$$

68 where  $f_{LGR_i|I_i=C_2}(x)$  and  $f_{LGR_i}(x)$  can be calculated from the fitted distributions. A sensible cutoff  
69 according to this approach is the point where a given gene is more likely to belong to Component 2 than  
70 Component 1, in other words  $q(x) = 0.5$ . We refer to this cutoff as  $L_{q,0.5}$ .

### 71 Validation prediction

72 We validated our SPI screens against GFP-free controls, however this can be a time-consuming activity  
73 and so we developed analytical methods to predict the probability of validation. A strain is considered  
74 to be a validated hit if its retested LGR exceeds the mean plus two standard deviations of the LGRs  
75 of GFP-free controls on the plate. Note this is different to the methodology of Berry et al. [2016], in  
76 which the maximum LGR of the GFP-free controls was used as a cutoff. We define the probability of  
77 validation for a given LGR,  $x$  to be :

$$p_V(x) = \mathbb{P}(LGR_i^V > K | LGR_i = x).$$

Using the law of total probability and conditioning on which of the categories gene  $G_i$  belongs to,

$$\begin{aligned} p_V(x) &= \mathbb{P}(LGR_i^V > K | I_i = C_1)\mathbb{P}(I_i = C_1 | LGR_i = x) \\ &+ \mathbb{P}(LGR_i^V > K | I_i = C_2, LGR_i = x)\mathbb{P}(I_i = C_2 | LGR_i = x). \end{aligned}$$

78 These values may all be simply calculated from the fitted mixture model, with the exception of  $\mathbb{P}(LGR_i^V >$   
79  $K|I_i = C_2, LGR_i = x)$ . We assume that

$$\mathbb{P}(LGR_i^V > K|I_i = C_2, LGR_i = x) \sim \text{Normal} \left( \mu = x, \sigma^2 = \frac{\alpha(\sigma_2)^2}{4} \right),$$

80 where  $\alpha$  is a tunable parameter. We chose to centre the distribution on the original measurement of the  
81 LGR based on our observation that generally validation LGRs are similar to the genome-wide screen  
82 values. The variance of this distribution is not trivial to describe as it represents both noise in the system  
83 and batch effects. We chose to use  $\frac{\alpha(\sigma_2)^2}{4}$ , where the factor of four is derived from the higher density of  
84 colonies (16 rather than 4) used in the retest, and  $\alpha$  is a tunable parameter representing batch effects.  
85 We found good accuracy using  $\alpha = 4$  and used this in all analysis.

86 We found that  $p_V(x)$  performed well at predicting validation rate and FPR, with some exceptions  
87 (see main text). We propose that the curve  $p_V(x)$  could be used as a tool when making decisions about  
88 how many results to validate in a genome-wide screen.

## 89 Code accessibility

90 R scripts for data formatting and analysis are freely available at [https://github.com/RowanHowell/](https://github.com/RowanHowell/data-analysis)  
91 `data-analysis`.

## 92 References

93 Y. Benjamini and Y. Hochberg. Controlling the False Discovery Rate: A Practical and Powerful Approach  
94 to Multiple Testing. *Journal of the Royal Statistical Society. Series B Methodological*, 57(1):289–300,  
95 Oct. 1995.

96 L. K. Berry, G. Ólafsson, E. Ledesma-Fernandez, and P. H. Thorpe. Synthetic protein interactions reveal  
97 a functional map of the cell. *eLife*, 5:e13053–17, Apr. 2016.

98 B. Efron. Large-Scale Simultaneous Hypothesis Testing. *Journal of the American Statistical Association*,  
99 99(465):96–104, Mar. 2004.

100 L. Scrucca, M. Fop, T. B. Murphy, and A. E. Raftery. mclust 5: Clustering, Classification and Density  
101 Estimation Using Gaussian Finite Mixture Models. *The R journal*, 8(1):289–317, Aug. 2016.
